# Supplementary material for: Growth of high quality single crystals of strontium doped (Nd,Pr)-nickelates, Nd2−xSrxNiO4+δ and Pr2−xSrxNiO4+δ
Source: Royal Society of Chemistry journal article supplement (doi:10.1039/c5ce00906e), 2015-01-01
Supplement: c5ce00906e1.pdf [file c5ce00906e1.pdf]

## SUPPLEMENTARY INFORMATION

### Growth of High Quality Single Crystals of Strontium doped (Nd,Pr) nickelates, $\text{Nd}_{2-x}\text{Sr}_x\text{NiO}_{4+\delta}$ and $\text{Pr}_{2-x}\text{Sr}_x\text{NiO}_{4+\delta}$

O. Wahyudi<sup>a,b,c,d,‡</sup>, M. Ceretti<sup>a\*</sup>, I. Weill<sup>b,c</sup>, A. Cousson<sup>e</sup>, F. Weill<sup>b,c</sup>, M. Meven<sup>f</sup>, M. Guerre<sup>a</sup>, A. Villesuzanne<sup>b,c,g</sup>, J.-M. Bassat<sup>b,c</sup>, W. Paulus<sup>a</sup>

<sup>a</sup>Institut Charles Gerhardt Montpellier, UMR 5253 CNRS-Université de Montpellier, Chimie et Cristallographie des Matériaux, Place Eugène Bataillon, 34095 Montpellier, France

<sup>b</sup>CNRS, ICMCB, UPR 9048, F-33600 Pessac, France

<sup>c</sup>Univ. Bordeaux, ICMCB, UPR 9048, F-33600 Pessac, France

<sup>d</sup>Sciences Chimiques de Rennes, Université de Rennes 1, France.

<sup>e</sup>Laboratoire Léon Brillouin, UMR 12 CEA-CNRS, Gif sur Yvette, 91191 France

<sup>f</sup>Heinz Maier-Leibnitz Zentrum (MLZ), Technische Universität München and RWTH Aachen University, Institut für Kristallographie, Outstation at MLZ, 85747 Garching, Germany

<sup>g</sup>IREET, University of Bolton, Bolton, BL3 5AB (UK)

<sup>h</sup>\* Corresponding author: [monica.ceretti@univ-montp2.fr](mailto:monica.ceretti@univ-montp2.fr)

<sup>‡</sup> Present address: Shanghai Institute of Ceramics, Chinese Academy of Sciences, 1295 Dingxi Road, Shanghai, P.R.China 200050

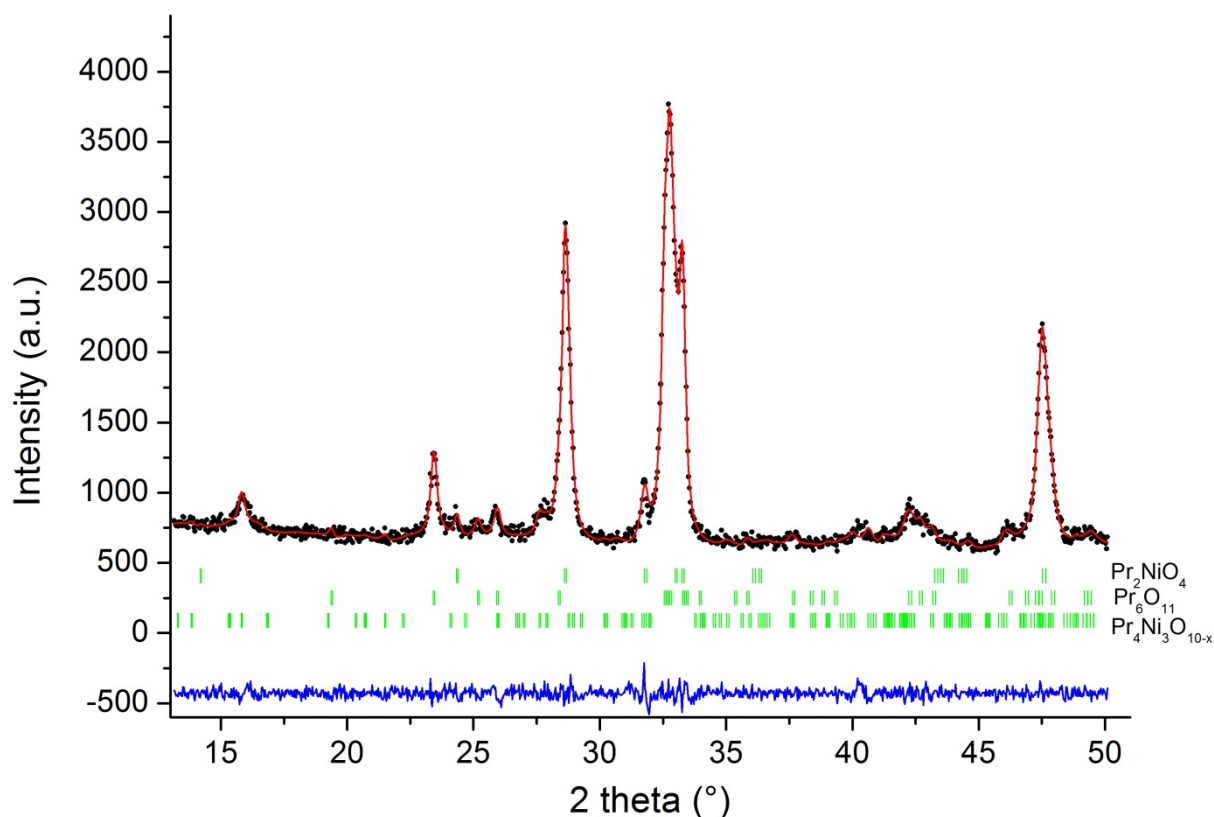

**Figure S1:** Characteristic XRD pattern of  $\text{Pr}_2\text{NiO}_{4+\delta}$  after air heating at  $1000^\circ\text{C}$  evidencing the partially decomposition into  $\text{Pr}_6\text{O}_{11}$  and  $\text{Pr}_4\text{Ni}_3\text{O}_{10-x}$  (PANalytical X'Pert powder diffractometer ( $\text{Cu K}\alpha_{1,2}$ ))

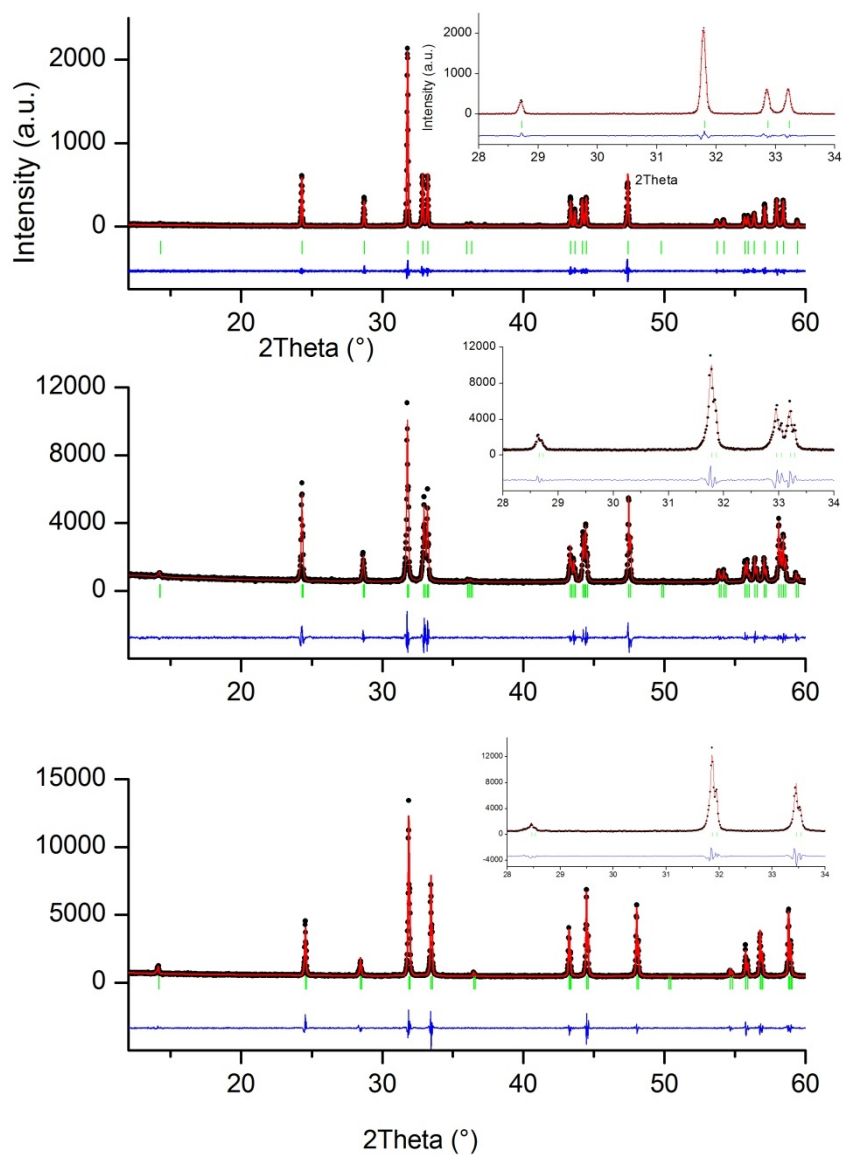

Figure S2: X-ray diffraction patterns of crushed as grown  $\text{Pr}_{2-x}\text{Sr}_x\text{NiO}_{4+\delta}$  single crystals. The upper diagram was obtained for  $x=0.00$  (orthorhombic), the middle corresponds to  $x=0.1$  while the bottom is for  $x=0.5$  (tetrahedral). XRD measurements have been performed with a *PANalytical* X'Pert powder diffractometer ( $\text{Cu K}\alpha_{1,2}$ )

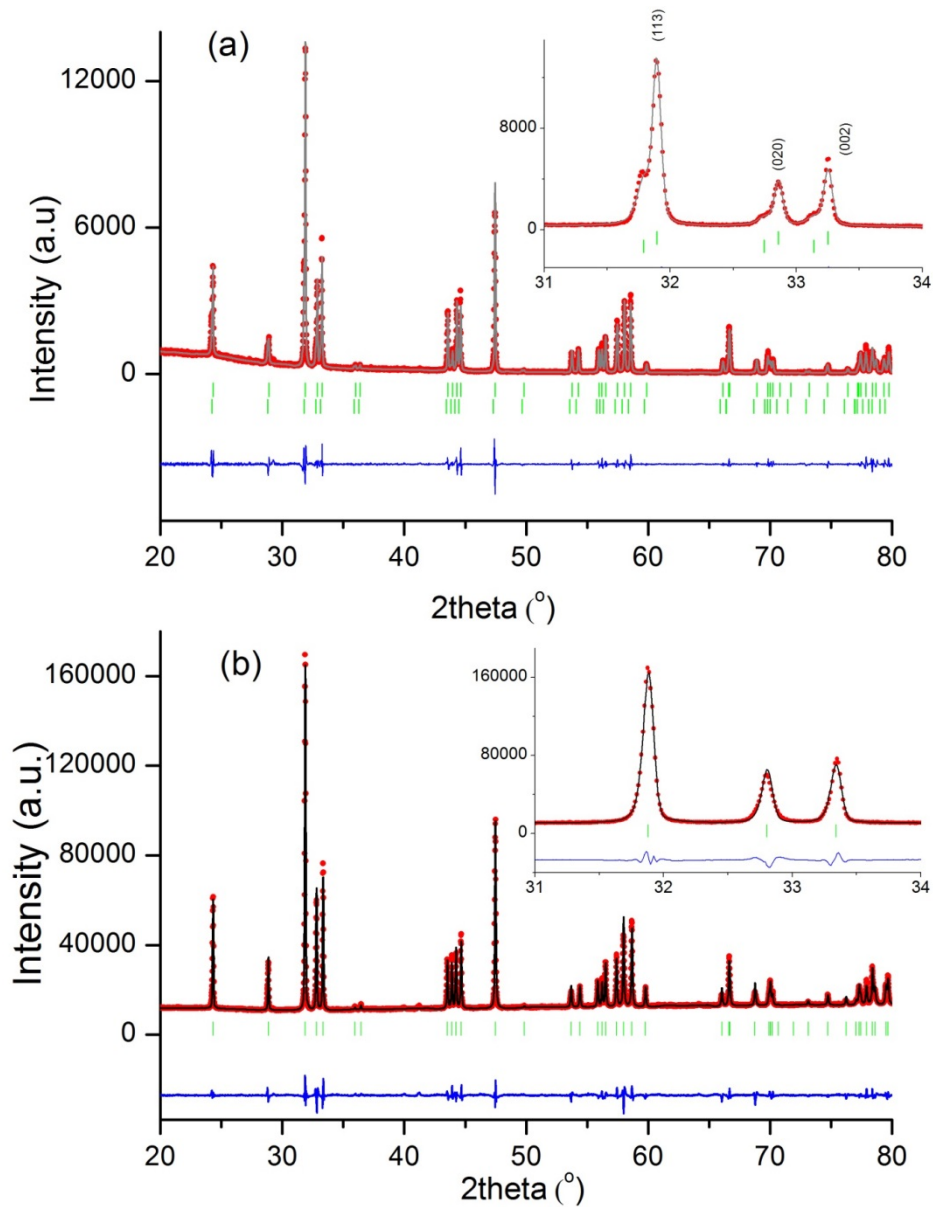

Figure S3 : XRD of the as grown undoped  $\text{Nd}_2\text{NiO}_{4+\delta}$  single crystal, before (a) and after (b) annealing at  $430^\circ\text{C}$ . (Diffractometer BRUKER D8,  $\text{Cu K}\alpha_1$ ). The same behaviour has been observed for the doped  $\text{Nd}_{2-x}\text{Sr}_x\text{NiO}_{4+\delta}$  (with  $x=0.1$  and  $x=0.5$ ) single crystals. The XRD diffraction pattern in the upper part clearly shows the presence of two phases with the same symmetry but different lattice parameters, due to the presence of a shoulder at lower two-theta angles of the (200) and (020) reflections, but also for the (113). This means that the two phases are different in the oxygen content, which has a direct consequence on the lattice parameters

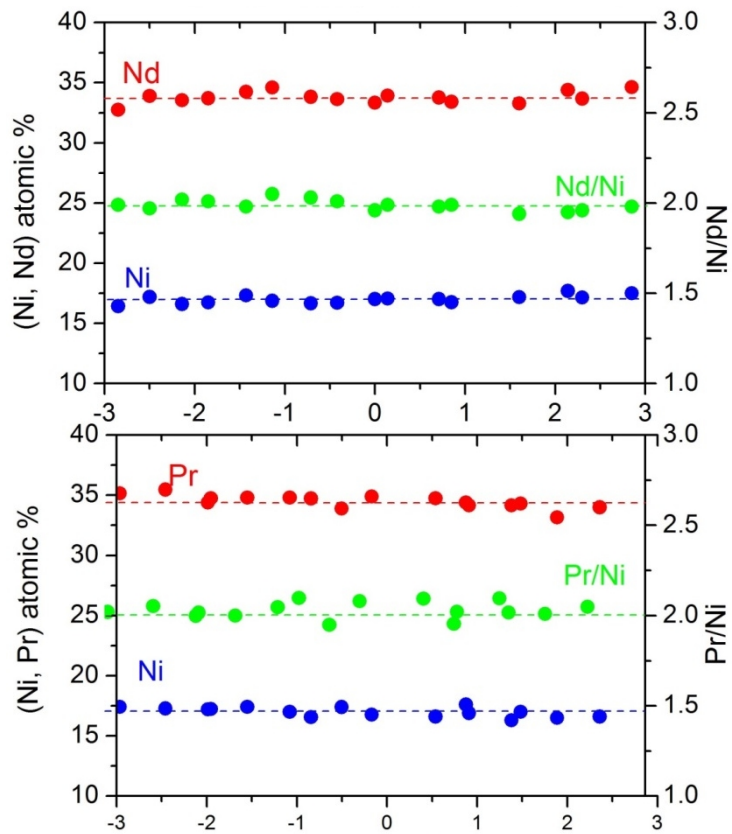

Distance from the cross section center of the as grown single crystal (mm)

Figure S4 : Upper part: atomic percentage of neodymium and nickel, as well as the Nd/Ni ratio (around 2), distribution over a cross section of the as grown NNO single crystal. The bottom part shows the results obtained on PNO single crystal.
